# Supplementary material for: Repression of tick microRNA-133 induces organic anion transporting polypeptide expression critical for Anaplasma phagocytophilum survival in the vector and transmission to the vertebrate host
Source: PubMed Central journal article supplement (PMC7331985; doi:10.1371/journal.pgen.1008856), 2020-07-02
Supplement: pgen.1008856.s008.pdf [file pgen.1008856.s008.pdf]

**S1 Table. Oligonucleotides used in this study**

| <b>Oligo Sequence 5' to 3'</b>     | <b>Purpose</b>                                                            |
|------------------------------------|---------------------------------------------------------------------------|
| GGTATCGTGCTCGACTC                  | <i>Ixodes scapularis actin</i> gene, qPCR                                 |
| CAGGGCGACGTAGCAG                   |                                                                           |
| CCCTAGGCACCAGGGTGTGA               | Mice actin gene, qPCR                                                     |
| GGGGTGTGTAAGGTCTCAAACA             |                                                                           |
| CCAGCGTTTAGCAAGATAAGAG             | <i>Anaplasma phagocytophilum -p44</i> gene                                |
| GCCCAGTAACAACATCATAAG              |                                                                           |
| GCGGTTCATAAAGGAGTGGA               | <i>Anaplasma phagocytophilum -dnaA</i> gene                               |
| AAACTTCCTGCGCCTCTGTA               |                                                                           |
| TAAACAATTAAGCTTTCTT                | Tick 16s rRNA (mt), qPCR                                                  |
| AATCGCTAAAACGGAECTTA               |                                                                           |
| CCGTCACGAAAACGCCTTCA               | <i>I. scapularis isoatp4056</i> qPCR                                      |
| GCTTCCACACGTCCACCTTCT              |                                                                           |
| TGGGATCCATGGCGTCCAGCTGCCT          | <i>I. scapularis isoatp4056</i> gene (Complete Coding part), Sequencing   |
| TGGTCGACGAGTATGTCTCAACACCTC<br>GCA |                                                                           |
| GGGTGTTCCACTGCACTCAGTA             | <i>I. scapularis henna</i> gene ( <i>phenylalanine hydroxylase</i> ) qPCR |
| GCACGTAGCCAATTTCTCAATC             |                                                                           |
| GCACAAGCGGGAECTCAAGGA              | <i>isoatp4056</i> 3' UTR region, sequencing                               |
| GTCATCCTGCAACTACCAGAGAGA           |                                                                           |
| GTCTGGCCTTTCACTACTCCTA             | Renilla luciferase (pmirGLO vector), qPCR                                 |
| GAGCATGGTCTCGACGAAGA               |                                                                           |
| GCCAAACGCTTCCACCTACCA              | Firefly luciferase (pmirGLO vector), qPCR                                 |
| GGTTCACACCCAGTGTCTTACC             |                                                                           |
| CCAGTGCAAATGACCAACTTTAG            | isc-miR-133 gene, sequencing                                              |
| CTTCACGAACGCACAGAAGGA              |                                                                           |
| CACCTTATCAGCGAGTCATCAA             | isc-miR-124 gene, sequencing                                              |
| CCGGAACACATCTTCTGATTG              |                                                                           |
| GCTTCGGCAGTACATATACTAA             | U6 spliceosomal RNA, sequencing                                           |
| CTTCACGATATTGCGTGTCAT              |                                                                           |
| TCTAAGCGGTGGATCACTCGGT             | 5.8s ribosomal gene, sequencing                                           |
| GACCCTCACACAGACGAAGCCA             |                                                                           |
| TCGTTAGTCCCCTTCAACCAG              | isc-miR-133 qPCR                                                          |
| TCGTTGGTTATCTAGCTGTATGA            | isc-miR-9b qPCR                                                           |
| TAATACACACGGTGAATGCCAA             | isc-miR-124 qPCR                                                          |
| CACAACCTCCTTGAGTGAGTGA             | Isc-miR-307 qPCR                                                          |
| TATTGTACTCGTCCCGGCCTT              | Isc-miR-235 qPCR                                                          |
| GGACGATACAGAGAAGATTAGCA            | U6 RNA qPCR                                                               |
| GCGTACCCTGTAGATCCGAA               | isc-miR-10 qPCR                                                           |
| TCCCTGAGACCCTAACTTGTGA             | isc-miR-125 qPCR                                                          |
| GCGAGGTAGTAGGTTGTATAGT             | isc-let7 qPCR                                                             |
| GTGTAGTCTGGCAGAAACGTC              | isc-miR-5310 qPCR                                                         |
| CGTGTACTTCATCAGGTGCTCT             | isc-miR-305 qPCR                                                          |

| <b>Oligo Sequence 5' to 3'</b>                                                                                     | <b>Purpose</b>                                                                     |
|--------------------------------------------------------------------------------------------------------------------|------------------------------------------------------------------------------------|
| TCTTGTCTCTGTGTCGTCGTT                                                                                              | isc-miR-5317a                                                                      |
| MIRUP-MystiCq® Universal PCR Primer<br>(Sigma, USA)                                                                | MicroRNA qPCR Universal Reverse                                                    |
| AAAC TA GCGGCCGC TAGT<br>CAAGCTGGTTGGGCTGGGCCAG T<br>CTAGA<br>CTGGCCCAGCCCAACCAGCTTG ACTA<br>GCGGCCGC TA GTTT      | isc-miR-133-targetSite ( <i>isoatp4056</i> -<br>22bp) Sense and Anti sense oligo's |
| AAAC TA GCGGCCGC TAGT<br>CAAGCTGGTTGGGCTGAACAG T<br>CTAGA CTGTTTCAGCCCAACCAGCTTG<br>ACTA GCGGCCGC TA GTTT          | isc-miR-133 mismatch site<br>Sense and Anti sense oligo's                          |
| TAATACGACTCACTATAGGGAG -<br>TCGACCGACTTCGGCCCGGTTTAGC<br>AGTTTAAGGGTACTTTCCTTAGTTATGT<br>AAACCAGGGGAAGTTGGTCGACACT | pre-mir-133 precursor sequence with T7<br>promotor at 3'UTR (DNA template)         |
