# Supplementary material for: Repression of tick microRNA-133 induces organic anion transporting polypeptide expression critical for Anaplasma phagocytophilum survival in the vector and transmission to the vertebrate host
Source: PubMed Central journal article supplement (PMC7331985; doi:10.1371/journal.pgen.1008856), 2020-07-02
Supplement: pgen.1008856.s009.pdf [file pgen.1008856.s009.pdf]

**S2 Table. Identification of miRNAs from *I. scapularis* genome.**

| miRNA         | mature Sequence                  | miRBase Accession Number | <i>Ixodes</i> genome ID | Blast Hit info           | strand | Pre-Mature Seq                                                                                               | MFE    | bp | G+C % | MFE I |
|---------------|----------------------------------|--------------------------|-------------------------|--------------------------|--------|--------------------------------------------------------------------------------------------------------------|--------|----|-------|-------|
| rmi-miR-9b    | UCUUUGGU<br>UAUCUAGC<br>UGUAUGA  | New Finding              | DS885551                | 436513<br>to<br>436535   | plus   | AGGCGCTGATATTTTCTTTGGTTA<br>TCTAGCTGTATGAGTGATATTAAC<br>ATCATAAAGCTAGGTTACCAAAG<br>TTAACAGCACTGCCG           | -34.70 | 86 | 38.4  | -1.05 |
| hlo-miR-307   | UCACAACCU<br>CCUUGAGU<br>GAG     | New Finding              | DS911299                | 1700331<br>to<br>1700311 | minus  | AGGGCCTTCCTCACTCAGTTTGGC<br>TGTGGTGTAAACGGGCGCTCGACCC<br>ATCACAACTCCTTGAGTGAGTGA<br>GGCTC                    | -40.00 | 78 | 59.0  | -0.87 |
| prd-miR-235   | UAUUGCAC<br>UCGUCCCGG<br>CCUG    | New Finding              | DS639501                | 298055<br>to<br>298036   | minus  | CAGGTCTGGATGAGTGCCAATGTT<br>GCGTAAATGCTGAATATTGCACTC<br>GTCCCGGCCTT                                          | -29.40 | 59 | 50.8  | -0.98 |
| rmi-miR-5317a | UUUCUUGU<br>CUCUGUGU<br>CGUCGUUU | New Finding              | DS677713                | 284899<br>to<br>284882   | minus  | GTCTGCAAAAACGAGCAAGCGC<br>TGATTGGGCCGTCTCTGTGTCGTC<br>GTTTCCTCAGGTGCGGAG                                     | -19.10 | 65 | 56.92 | -0.52 |
| dme-miR-125   | UCCUGAG<br>ACCUAACU<br>UGUGA     | New Finding              | DS978597                | 217092<br>to<br>217071   | minus  | CCCCACTCCCTGAGACCCTAACTT<br>GTGATGCGTTCTGCGCCGCCTTCC<br>CAGGTTAGATTCTCAGGCCCTGGG<br>T                        | -32.10 | 73 | 60.27 | -0.73 |
| isc-miR-10    | UACCCUGU<br>AGAUCCGA<br>AUUGU    | MI001226<br>2            | DS891538                | 2780819<br>to<br>2780840 | plus   | TCTACATCTACCCTGTAGATCCGA<br>ATTTGTCTGCAACAAGACTACAAA<br>TTCGGTTCTAGAGAGGTTTGTGTG<br>GT                       | -31.10 | 74 | 50    | -0.84 |
| isc-miR-133   | UUGGUCCCC<br>UUCAACCA<br>GCUGU   | MI001226<br>6            | DS613658                | 228784<br>to<br>228763   | minus  | ACCAACTTTAGCTGGCTGAAGCCG<br>GGCCAAATCGTCATAATTCCCATG<br>AAAAGGAATCTCAATACATTTGGT<br>CCCCTTCAACCAGCTGTGGTTGGC | -42.00 | 96 | 47.92 | -0.91 |

| miRNA        | mature Sequence                 | miRBase Accession Number | <i>Ixodes</i> genome ID | Blast Hit info         | strand | Pre-Mature Seq                                                                        | MFE    | bp | G+C % | MFE I |
|--------------|---------------------------------|--------------------------|-------------------------|------------------------|--------|---------------------------------------------------------------------------------------|--------|----|-------|-------|
| isc-miR-124  | UAAGGCAC<br>GCGGUGAA<br>UGCCAAG | MI001226<br>5            | DS840700                | 85204 to<br>85226      | plus   | GCTCTCCGTATTCCTGCGCGCCT<br>TGATGTGCCCAAACGTATCATAAG<br>GCACGCGGTGAATGCCAAGAGG         | -36.20 | 70 | 55.71 | -0.93 |
| isc-miR-5310 | UGUAGUCU<br>GGCAGAAA<br>CGUCG   | MI001849<br>0            | DS649088                | 485403<br>to<br>485383 | minus  | GCGGCGTTTGGTTCGGACTACACCG<br>TGAGGGTGCTCCTGGAGTCGAGG<br>TGTAGTCTGGCAGAAACGTCGG        | -37.40 | 69 | 62.32 | -0.87 |
| isc-miR-305  | AUUGUACU<br>UCAUCAGG<br>UGCUCUG | MI001644<br>4            | DS945001                | 228337<br>to<br>228315 | minus  | AGTTAATTGTACTTCATCAGGTGC<br>TCTGGAGTTCGGTTCGCACAACCA<br>GGCATCTTTTGGAGTGCAAATGAT<br>A | -29.30 | 73 | 43.84 | -0.92 |
| isc-let-7    | UGAGGUAG<br>UAGGUUGU<br>AUAGU   | MI001226<br>0            | No hits                 |                        |        |                                                                                       |        |    |       |       |

*Isc-Ixodes scapularis*;  
*rmi-Rhipicephalus microplus*;  
*hlo-Haemaphysalis longicornis*;  
*dme-Drosophila melanogaster*;  
*prd-Panagrellus redivivus*
