# Supplementary material for: Repression of tick microRNA-133 induces organic anion transporting polypeptide expression critical for Anaplasma phagocytophilum survival in the vector and transmission to the vertebrate host
Source: PubMed Central journal article supplement (PMC7331985; doi:10.1371/journal.pgen.1008856), 2020-07-02
Supplement: pgen.1008856.s010.pdf [file pgen.1008856.s010.pdf]

**S3 Table. ANOVA analysis for the data presented in Figures 5, 7A and 7B**

| Figures   | Data comparison                       | One way ANOVA P value |
|-----------|---------------------------------------|-----------------------|
| Figure 5A | Control - miR-133 mimic               | < 0.0001              |
|           | Control - miR-133 Inhibitor           |                       |
|           | miR-133 mimic - miR-133 Inhibitor     |                       |
| Figure 5B | Control - miR-133 mimic               | 0.5511                |
|           | Control - miR-133 Inhibitor           |                       |
|           | miR-133 mimic - miR-133 Inhibitor     |                       |
| Figure 5C | Control - miR-133 mimic               | 0.0013                |
|           | Control - miR-133 Inhibitor           |                       |
|           | miR-133 mimic - miR-133 Inhibitor     |                       |
| Figure 5D | Control - miR-133 mimic               | 0.034                 |
|           | Control - miR-133 Inhibitor           |                       |
|           | miR-133 mimic - miR-133 Inhibitor     |                       |
| Figure 5E | Control - pre miR-133 mimic           | 0.0021                |
|           | Control - miR-133 Inhibitor           |                       |
|           | pre miR-133 mimic - miR-133 Inhibitor |                       |
| Figure 5F | Control - pre miR-133 mimic           | 0.0476                |
|           | Control - miR-133 Inhibitor           |                       |
|           | pre miR-133 mimic - miR-133 Inhibitor |                       |
| Figure 5G | Control - pre miR-133 mimic           | 0.0008                |
|           | Control - miR-133 Inhibitor           |                       |
|           | pre miR-133 mimic - miR-133 Inhibitor |                       |
| Figure 7A | Control - pre miR-133 mimic           | 0.0002                |
|           | Control - miR-133 Inhibitor           |                       |
|           | pre miR-133 mimic - miR-133 Inhibitor |                       |
| Figure 7B | Control - pre miR-133 mimic           | 0.0679                |
|           | Control - miR-133 Inhibitor           |                       |
|           | pre miR-133 mimic - miR-133 Inhibitor |                       |
